# Supplementary material for: Metabolomic analysis of liver and skeletal muscle tissues in C57BL/6J and DBA/2J mice exposed to 2,3,7,8-tetrachlorodibenzo- p -dioxin
Source: Royal Society of Chemistry journal article supplement (doi:10.1039/c1mb05057e), 2011-04-05

Metabolomic Analysis of Liver and Skeletal Muscle Tissues in C57BL/6J and DBA/2J Mice  
Exposed to 2,3,7,8-Tetrachlorodibenzo-*p*-Dioxin

Shuhai Lin<sup>†</sup>, Zhu Yang<sup>‡</sup>, Hongde Liu<sup>§</sup>, Zongwei Cai<sup>†,\*</sup>

<sup>†</sup> Department of Chemistry, Hong Kong Baptist University, Hong Kong SAR, China

<sup>‡</sup> Department of Physics, Hong Kong Baptist University, Hong Kong SAR, China

<sup>§</sup> State Key Laboratory of Bioelectronics, Southeast University, Nanjing, China

\* To whom correspondence should be addressed. Address: Department of Chemistry, Hong Kong Baptist University, Hong Kong SAR, China. Fax: +852-3411 7348, Tel: +852-3411 7070.

E-mail address: [zwcai@hkbu.edu.hk](mailto:zwcai@hkbu.edu.hk)

## Figure Legends:

Figure S1. Variance explained (%) of PCA models generated from the tissue sample sets. The accumulative eigenvalues of the first two components were 97.29%, 93.62%, 75.02% and 79.44% for C6 liver (A), C6 skeletal muscle (B), D2 liver (C) and D2 skeletal muscle (D), respectively.

Figure S2. Classifications of C6 liver (A), C6 skeletal muscle (B), D2 liver (C) and D2 skeletal muscle (D) in SVM models were performed using RBF kernel (C6: n=8 in control group, n=7 in TCDD group; D2: n=5 in control group, n=7 in TCDD group).

Figure S3. Grid parameter search for regression. The color bars denote the accuracy of the classification performance of SVM models and the parameters C and  $\gamma$  could be checked back from the corresponding area. The wide range from  $10^{-10}$  to  $10^{10}$  for either C or  $\gamma$  was selected. The grid search computational results for the raw data sets from C6 liver (A), C6 skeletal muscle (B), D2 liver (C) and D2 skeletal muscle (D), respectively. The results varied with the kernel parameter  $\gamma$  from large to small along the direction of the arrow.

Figure S4. Z-score plots of C6 skeletal muscle sample sets for 15 metabolites (red: control; green: TCDD exposure. z-score range: -5 to 20).

Figure S5. Z-score plots of D2 liver sample sets and D2 skeletal muscle sample sets (red: control; green: TCDD exposure. z-score range: -5 to 20 for D2 liver; z-score range: -10 to 8 for D2 skeletal muscle).

Figure S1.

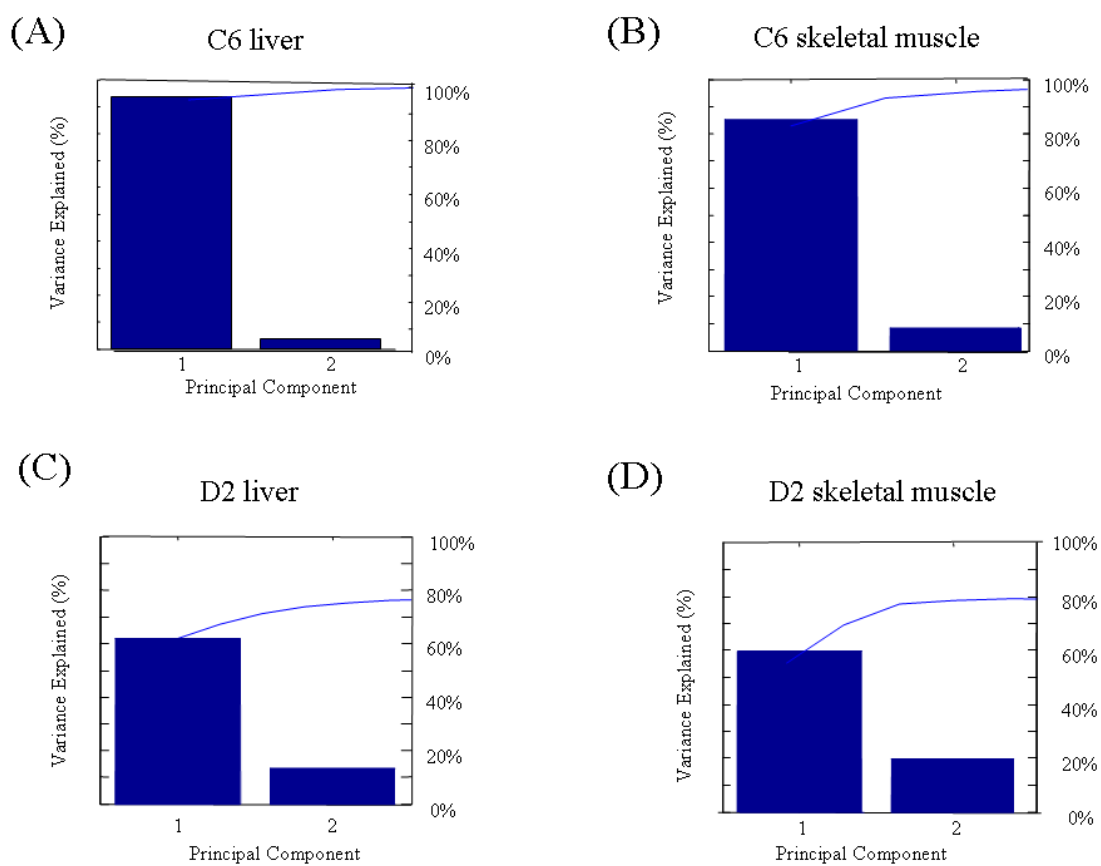

Figure S2.

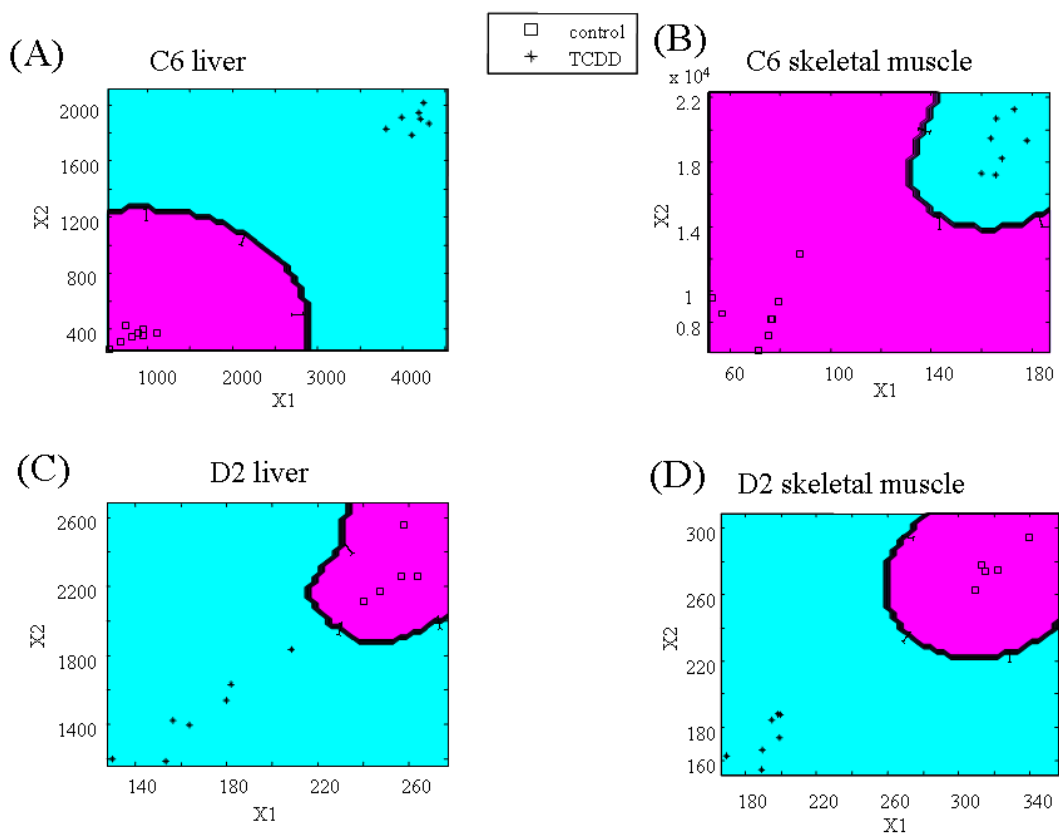

Figure S3.

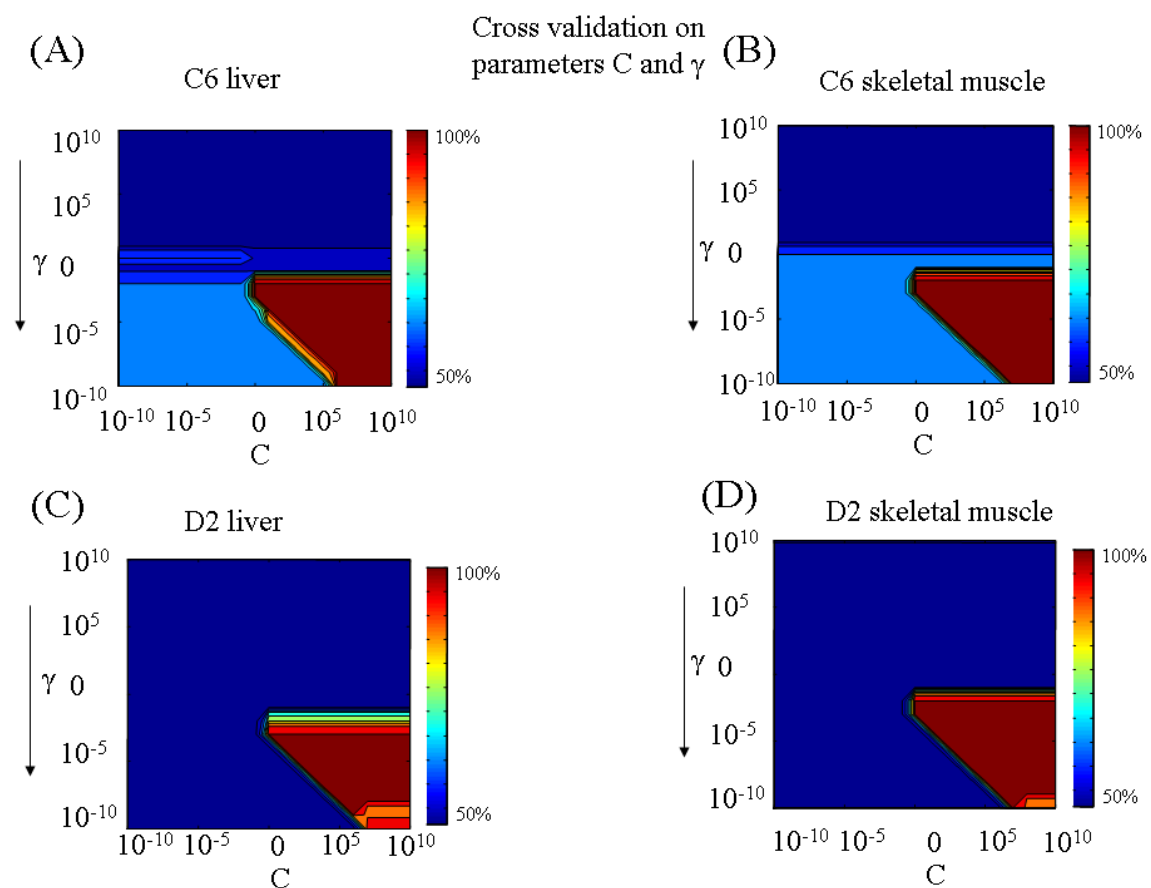

Figure S4.

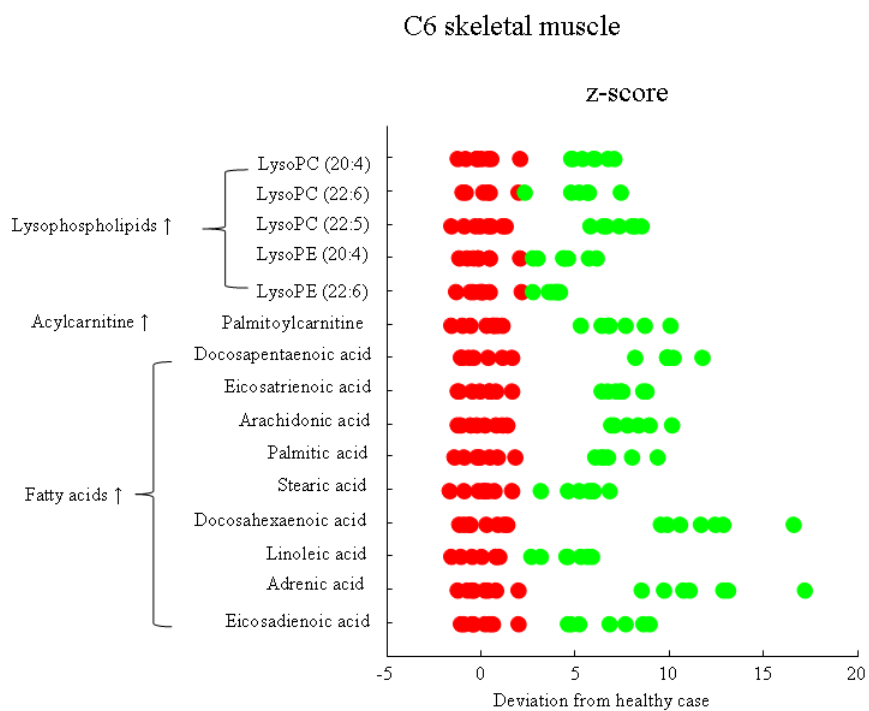

Figure S5.

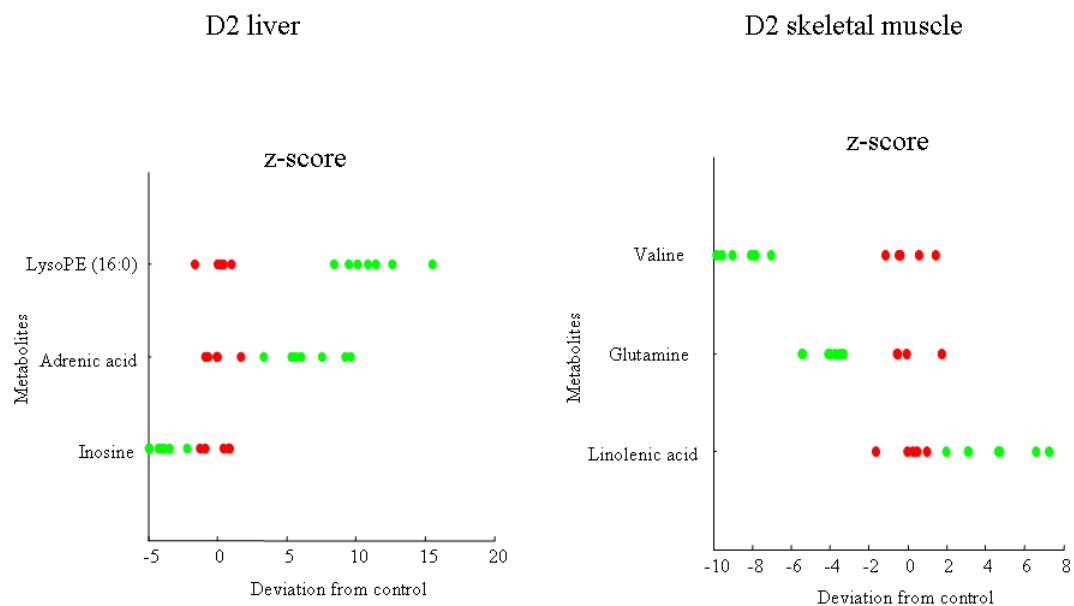

Supplement: c1mb05057e.pdf [file c1mb05057e.pdf]
